# Supplementary material
Source: PubMed Central journal article supplement (PMC8627257)
Supplement: NIHMS1748043-supplement-Supplemental_Publication_Material.pdf [file NIHMS1748043-supplement-Supplemental_Publication_Material.pdf]

## Supplemental Content

### **Echocardiographic and Electrocardiographic Abnormalities Among Elderly Adults with Cardiovascular Disease in Rural South Africa.**

Enrico G. Ferro, MD; Shafika Abrahams-Gessel, DrPH; Thiago Veiga Jardim, MD PhD; Ryan Wagner, PhD; F. Xavier Gomez-Olive MD MSc; Alisha N. Wade MD PhD; Ferande Peters MD; Stephen Tollman MPH PhD; Thomas A. Gaziano MD MSc.

#### **Table of Contents**

- **Supplementary Methods:** Electrocardiographic and Echocardiographic Analyses.
- **Supplementary Table 1:** Prevalence of Additional Electrocardiographic Abnormalities in Total Study Sample.
- **Supplementary Table 2:** Prevalence of Additional Echocardiographic Abnormalities in Total Study Sample.
- **Supplementary Table 3:** Prevalence of Electrocardiographic and Echocardiographic Abnormalities Among Obese Patients.
- **Supplementary Table 4:** Prevalence of Electrocardiographic Abnormalities Stratified by Age.
- **Supplementary Table 5:** Prevalence of Echocardiographic Abnormalities Stratified by Age.
- **Supplementary Table 6:** Missing Data.

#### **Supplementary Methods: Electrocardiographic and Echocardiographic Analyses**

Standard 12-lead ECGs were interpreted by E.G.F., T.V.J. and T.A.G., who were blinded to clinical information. The following electrocardiographic (EKG) abnormalities were pooled to define a composite variable known as major EKG abnormalities, based on the sex-specific Minnesota EKG Code:<sup>11</sup> left ventricular hypertrophy (LVH) as defined in the main text, ventricular conduction defects, including codes 7-1 for left bundle branch block (LBBB), 7-2 for right bundle branch block (RBBB), 7-4 for intraventricular conduction delay (IVCD); major Q wave abnormalities (codes I-1, 1-2 except 1-2-8); major ST-T wave abnormalities (codes 4-1, 4-2, 5-1, 5-2 without 3-1, 3-3, 1-1 to 1-3); atrial fibrillation (AF), code 8-3.

Two-dimensional and color Doppler Transthoracic echocardiography (TTE) was performed by two accredited sonographers using a Vivid q machine (General Electric), and were interpreted by F.P., who was blinded to clinical information. TTE measurement of diastolic dysfunction based on the 2016 ASE/EACVI expert consensus could not be performed,<sup>33</sup> as average E/e' and tricuspid regurgitant velocity measurements were missing in many participants. We therefore defined diastolic dysfunction based on a recently published study,<sup>34</sup> which employed mitral E/A ratio, E-wave deceleration time (EDT) and Left Atrial Volume Index (LAVI) – all of which are listed as reliable parameters to assess

diastolic dysfunction in the 2016 ASE/EACVI expert consensus.<sup>33</sup> Using these parameters, we defined normal diastolic function (E/A: 0.76-1.5 and EDT: 151-240 and LAVI <28 ml/m<sup>2</sup>), mild (E/A: < 0.75 OR EDT>240 ms), moderate (E/A: 0.76-1.5 and EDT 151-240 ms and LAVI ≥28 ml/m<sup>2</sup>) and severe (E/A: >1.5 or EDT: ≤150 ms) diastolic dysfunction.<sup>34</sup>

### **References**

11. Prineas RJ, Crow RS, Blackburn H. The Minnesota Code Manual of Electrocardiographic Findings: Standards and Procedures for Measurement and Classification. Littleton, MA: John Wright-PSG Inc; 1982.
33. Nagueh SF, Smiseth OA, Appleton CP, Byrd BF, 3rd, Dokainish H, Edvardsen T, et al. Recommendations for the Evaluation of Left Ventricular Diastolic Function by Echocardiography: An Update from the American Society of Echocardiography and the European Association of Cardiovascular Imaging. *Journal of the American Society of Echocardiography* : official publication of the American Society of Echocardiography. 2016;29(4):277-314. Epub 2016/04/03. doi: 10.1016/j.echo.2016.01.011. PubMed PMID: 27037982.
34. Tsang TS, Barnes ME, Gersh BJ, Takemoto Y, Rosales AG, Bailey KR, et al. Prediction of risk for first age-related cardiovascular events in an elderly population: the incremental value of echocardiography. *Journal of the American College of Cardiology*. 2003;42(7):1199-205. Epub 2003/10/03. doi: 10.1016/s0735-1097(03)00943-4. PubMed PMID: 14522480.

**Supplementary Table 1: Prevalence of Additional Electrocardiographic Abnormalities in Total Study Sample**

|                                      | All (n=729)  | Male (n=291) | Female (n=438) | p-value |
|--------------------------------------|--------------|--------------|----------------|---------|
| <b>Rhythm</b>                        | <b>N (%)</b> | <b>N (%)</b> | <b>N (%)</b>   |         |
| Sinus Bradycardia                    | 146 (20.03)  | 60 (20.62)   | 86 (19.63)     | 0.7451  |
| Sinus Tachycardia                    | 4 (0.55)     | 2 (0.69)     | 2 (0.46)       | 0.6532  |
| Atrial Flutter                       | 2 (0.27)     | 1 (0.34)     | 1 (0.23)       | 1       |
| Wide Complex Tachycardia             | 1 (0.14)     | 0 (0)        | 1 (0.023)      | 1       |
| First Degree Atrioventricular Block  | 53 (7.27)    | 19 (6.53)    | 34 (7.76)      | 0.5299  |
| Higher Degree Atrioventricular Block | 0            | 0            | 0              | N/A     |
| Evidence of Paced Beats              | 0            | 0            | 0              | N/A     |
| <b>Other ECG Variables</b>           | <b>N (%)</b> | <b>N (%)</b> | <b>N (%)</b>   |         |
| Left Axis Deviation                  | 38 (5.21)    | 17 (5.84)    | 21 (4.79)      | 0.5332  |
| Left Atrial Hypertrophy              | 73 (10.01)   | 36 (12.37)   | 37 (8.45)      | 0.0839  |
| Right Axis Deviation                 | 2 (0.27)     | 2 (0.69)     | 0              | 0.159   |
| Right Ventricular Hypertrophy        | 1 (0.14)     | 0            | 1 (0.23)       | 1       |
| Right Atrial Hypertrophy             | 14 (1.92)    | 8 (2.75)     | 6 (1.37)       | 0.1839  |

**Table Legend.** ECG, electrocardiogram;

**Supplementary Table 2: Prevalence of Additional Echocardiographic Abnormalities in Total Study Sample**

|                                             | Total<br>(N=155)    | Male<br>(n=52)      | Female<br>(n=103)   | p-<br>value  |
|---------------------------------------------|---------------------|---------------------|---------------------|--------------|
| <b>Diastolic Function Parameters</b>        | <b>N (%)</b>        | <b>N (%)</b>        | <b>N (%)</b>        |              |
| E/A Ratio, mean ( $\pm$ SD)                 | 0.89 ( $\pm$ 0.32)  | 0.89 ( $\pm$ 0.31)  | 0.89 ( $\pm$ 0.32)  | 0.92         |
| < 0.75                                      | 60 (38.7)           | 26 (50.0)           | 34 (33.0)           | 0.10         |
| $\geq$ 0.75 but $\leq$ 1.5                  | 89 (57.4)           | 24 (46.2)           | 65 (63.1)           |              |
| > 1.5                                       | 6 (3.9)             | 2 (3.9)             | 4 (3.9)             |              |
| LAVi, mean in mL/m <sup>2</sup> ( $\pm$ SD) | 48.4 ( $\pm$ 19.2)  | 44.1 ( $\pm$ 17.9)  | 50.5 ( $\pm$ 19.5)  | 0.05         |
| < 28                                        | 21 (13.6)           | 9 (17.3)            | 12 (11.7)           | 0.33         |
| $\geq$ 28                                   | 134 (86.5)          | 43 (82.7)           | 91 (88.4)           |              |
| EDT, mean in ms ( $\pm$ SD)                 | 196.5 ( $\pm$ 53.1) | 183.3 ( $\pm$ 51.6) | 203.0 ( $\pm$ 52.9) | <b>0.03</b>  |
| $\leq$ 150                                  | 37 (23.9)           | 18 (34.6)           | 19 (18.5)           | <b>0.04</b>  |
| > 150 but $\leq$ 240                        | 89 (57.4)           | 28 (53.9)           | 61 (59.2)           |              |
| > 240                                       | 29 (18.7)           | 6 (11.5)            | 23 (22.3)           |              |
| <b>LV Chamber Dimensions</b>                | <b>N (%)</b>        | <b>N (%)</b>        | <b>N (%)</b>        |              |
| LVEDSD, mean in mm ( $\pm$ SD)              | 29.6 ( $\pm$ 5.1)   | 30.3 ( $\pm$ 5.5)   | 29.3 ( $\pm$ 4.9)   | 0.21         |
| Normal LVEDSD                               | 145 (93.5)          | 50 (96.2)           | 95 (92.2)           | 0.50         |
| High LVEDSD                                 | 10 (6.5)            | 2 (3.9)             | 8 (7.8)             |              |
| LVEDDD, mean in mm ( $\pm$ SD)              | 43.7 ( $\pm$ 5.6)   | 45.1 ( $\pm$ 6.3)   | 43.0 ( $\pm$ 5.1)   | <b>0.03</b>  |
| Normal LVEDDD                               | 151 (97.4)          | 52 (100)            | 99 (96.1)           | 0.30         |
| High LVEDDD                                 | 4 (2.6)             | 0 (0)               | 4 (3.9)             |              |
| LVESV, mean in mL ( $\pm$ SD)               | 35.5 ( $\pm$ 14.5)  | 39.4 ( $\pm$ 16.0)  | 33.4 ( $\pm$ 13.3)  | <b>0.02</b>  |
| Normal LVESV                                | 139 (89.7)          | 49 (94.2)           | 90 (87.4)           | 0.27         |
| High LVESV                                  | 16 (10.3)           | 3 (5.8)             | 13 (12.6)           |              |
| LVEDV, mean in mL ( $\pm$ SD)               | 83.6 ( $\pm$ 23.7)  | 91.9 ( $\pm$ 26.5)  | 79.4 ( $\pm$ 21.1)  | <b>0.003</b> |
| Normal LVEDV                                | 141 (91.0)          | 50 (96.2)           | 91 (88.3)           | 0.14         |
| High LVEDV                                  | 14 (9.0)            | 2 (3.8)             | 12 (11.6)           |              |
| <b>Other Variables</b>                      | <b>N (%)</b>        | <b>N (%)</b>        | <b>N (%)</b>        |              |
| IVC Diameter, mean in mm ( $\pm$ SD)        | 14.1 ( $\pm$ 3.0)   | 13.9 ( $\pm$ 3.6)   | 14.2 ( $\pm$ 2.6)   | 0.65         |
| < 21 mm                                     | 153 (98.7)          | 50 (96.1)           | 103 (100)           | 0.11         |
| $\geq$ 21 mm                                | 2 (1.3)             | 2 (3.9)             | 0                   |              |
| IVC Status                                  | -                   | -                   | -                   | -            |
| Collapsing                                  | 151 (98.2)          | 50 (100)            | 101 (98.1)          | 1            |
| Unreactive                                  | 2 (1.8)             | 0                   | 2 (1.9)             |              |
| Pericardial Effusion                        | 0                   | 0                   | 0                   | -            |

**Table Legend.** EDT, E deceleration time; IVC, inferior vena cava; LAVi, left atrial volume index; LVEDD, left ventricular end diastolic diameter; LVEDV, left ventricular end diastolic volume; LVESD, left ventricular end systolic diameter; LVESV, left ventricular end systolic volume.

**Supplementary Table 3: Prevalence of Electrocardiographic and Echocardiographic Abnormalities Among Obese Patients.**

|                                | Obesity         |                |                 |
|--------------------------------|-----------------|----------------|-----------------|
|                                | Yes<br>(N= 460) | No<br>(N= 269) |                 |
| <b>ECG Variable</b>            | N (%)           | N (%)          | p-value*        |
| Any Major ECG Abnormality      | 125 (46.5)      | 222 (48.3)     | 0.64            |
| Any Q Wave Abnormality         | 17 (6.3)        | 38 (8.3)       | 0.34            |
| Any ST-T Segment Abnormality   | 3 (1.1)         | 10 (2.2)       | 0.39            |
| Left Ventricular Hypertrophy** | 101 (37.6)      | 165 (35.9)     | 0.65            |
| Left Bundle Branch Block       | 1 (0.4)         | 1 (0.2)        | 1.00            |
| Right Bundle Branch Block      | 4 (1.5)         | 7 (1.5)        | 1.00            |
| Atrial Fibrillation            | 0               | 2 (0.4)        | 0.53            |
| Left Axis Deviation            | 12 (4.5)        | 26 (5.7)       | 0.49            |
| Right Axis Deviation           | 2 (0.8)         | 0              | 0.14            |
| Prolonged QTc                  | 46 (17.1)       | 91 (19.8)      | 0.37            |
|                                | Yes<br>(N= 95)  | No<br>(N= 60)  |                 |
| <b>TTE Variable</b>            | N (%)           | N (%)          | p-value*        |
| Ejection Fraction <40%         | 3 (5.0)         | 2 (2.1)        | 0.38            |
| Mod Diastolic Dysfunction      | 12 (20.0)       | 36 (37.9)      | <b>0.02</b>     |
| Sev Diastolic Dysfunction      | 17 (28.3)       | 23 (24.2)      | 0.57            |
| Eccentric LVH                  | 7 (11.7)        | 16 (16.8)      | 0.38            |
| Concentric LVH                 | 9 (15.0)        | 40 (42.1)      | <b>&lt;0.01</b> |
| High RWT                       | 66 (69.5)       | 34 (56.7)      | 0.10            |
| High LVM                       | 16 (26.7)       | 56 (59.0)      | <b>&lt;0.01</b> |
| High LVMi                      | 27 (45.0)       | 44 (46.3)      | 0.88            |
| High IVSd                      | 31 (56.7)       | 75 (79.0)      | <b>&lt;0.01</b> |
| High PWD                       | 25 (41.7)       | 67 (70.5)      | <b>&lt;0.01</b> |
| High LAVi                      | 47 (78.3)       | 87 (91.6)      | <b>0.02</b>     |
| High LVESD                     | 4 (6.7)         | 6 (6.3)        | 0.93            |
| High LVEDD                     | 2 (3.3)         | 2 (2.1)        | 0.65            |

**Table Legend.** ECG, Electrocardiogram; QTc, rate-corrected and gender-specific QT interval; TTE, transthoracic echocardiogram; IVSd, interventricular septum diameter; PWD, posterior wall diameter; LVM/LVMi, left ventricular mass/index; LVH, left ventricular hypertrophy; LAVi, left atrium volume index; LVESD/ LVEDD, left ventricular end systolic/diastolic diameter; RWT, relative wall thickness. \* Chi-square probability or Fisher's exact probability where any cell count  $\leq 5$ ; \*\* Left ventricular hypertrophy was defined by the combination of gender-specific Sokolow-Lyon, Cornell and Peguero criteria.

**Supplementary Table 4: Prevalence of Electrocardiographic Abnormalities Stratified by Age.**

|                                          | All<br>(n=729) | Age 40-54<br>(n=360) | Age≥55<br>(n=369) | p-value      |
|------------------------------------------|----------------|----------------------|-------------------|--------------|
| <b>Major ECG Abnormalities</b>           | <b>N (%)</b>   | <b>N (%)</b>         | <b>N (%)</b>      |              |
| Any Major ECG Abnormality (composite)    | 347 (47.6)     | 155 (43.1)           | 192 (52.0)        | <b>0.015</b> |
| Left Ventricular Hypertrophy*            | 266 (36.5)     | 110 (30.6)           | 156 (42.3)        | <b>0.001</b> |
| Any Major Q Wave Abnormality             | 55 (7.5)       | 26 (7.2)             | 29 (7.9)          | 0.745        |
| Any Major ST Segment Abnormality         | 13 (1.8)       | 4 (1.1)              | 9 (2.4)           | 0.263        |
| Any Major T Wave Abnormality             | 99 (13.6)      | 43 (12.0)            | 56 (15.2)         | 0.203        |
| Intra Ventricular Conduction Delay       | 4 (0.6)        | 1 (0.3)              | 3 (0.8)           | 0.624        |
| Left Bundle Branch Block                 | 2 (0.3)        | 0                    | 2 (0.5)           | 0.499        |
| Right Bundle Branch Block                | 11 (1.5)       | 4 (1.1)              | 7 (1.9)           | 0.546        |
| Atrial Fibrillation                      | 2 (0.3)        | 1 (0.3)              | 1 (0.3)           | 1.00         |
| <b>Other Conduction Defects</b>          | <b>N (%)</b>   | <b>N (%)</b>         | <b>N (%)</b>      |              |
| Prolonged QTc                            | 137 (18.8)     | 58 (16.1)            | 79 (21.4)         | 0.067        |
| <b>Q Wave Abnormality Distribution**</b> | <b>N (%)</b>   | <b>N (%)</b>         | <b>N (%)</b>      |              |
| Inferior (Posterior) Q Wave Abnormality  | 18 (2.5)       | 10 (2.8)             | 8 (2.2)           | 0.596        |
| Anterior Q Wave Abnormality              | 15 (2.1)       | 6 (1.7)              | 9 (2.4)           | 0.463        |
| Lateral Q Wave Abnormality               | 23 (3.2)       | 11 (3.1)             | 12 (3.3)          | 0.879        |
| <b>T Wave Abnormality Distribution**</b> | <b>N (%)</b>   | <b>N (%)</b>         | <b>N (%)</b>      |              |
| Inferior T Wave Abnormality              | 42 (5.8)       | 17 (4.7)             | 25 (6.8)          | 0.234        |
| Anterior T Wave Abnormality              | 54 (7.4)       | 26 (7.2)             | 28 (7.6)          | 0.850        |
| Lateral T Wave Abnormality               | 54 (7.4)       | 23 (6.4)             | 31 (8.4)          | 0.300        |

**Table Legend.** ECG, Electrocardiogram; QTc, rate-corrected and sex-specific QT interval; \* Left Ventricular Hypertrophy was defined by the combination of sex-specific Sokolow-Lyon, Cornell and Peguero criteria; \*\* The distribution of each abnormality is not mutually exclusive.

**Supplementary Table 5: Prevalence of Echocardiographic Abnormalities Stratified by Age.**

|                                             | Total<br>(N=155)    | Age 40-54<br>(n=51) | Age≥55<br>(n=104)   |                |
|---------------------------------------------|---------------------|---------------------|---------------------|----------------|
| <b>Systolic Function</b>                    | <b>N (%)</b>        | <b>N (%)</b>        | <b>N (%)</b>        | <b>p-value</b> |
| EF, mean in % ( $\pm$ SD)                   | 58.3 ( $\pm$ 8.6)   | 58.5 ( $\pm$ 8.5)   | 58.3 ( $\pm$ 8.6)   | 0.875          |
| EF <40%                                     | 5 (3.3)             | 1 (2.0)             | 4 (3.9)             | 0.282*         |
| EF 41-49%                                   | 11 (7.1)            | 6 (11.8)            | 5 (4.9)             |                |
| EF $\geq$ 50%                               | 138 (89.6)          | 44 (86.3)           | 94 (91.3)           |                |
| <b>Diastolic Function</b>                   | <b>N (%)</b>        | <b>N (%)</b>        | <b>N (%)</b>        | <b>p-value</b> |
| Normal Diastolic Function                   | 2 (1.3)             | 0                   | 2 (1.9)             | <0.001**       |
| Mild Diastolic Dysfunction                  | 65 (41.9)           | 10 (19.6)           | 55 (52.3)           |                |
| Moderate Diastolic Dysfunction              | 48 (31.0)           | 20 (39.2)           | 28 (26.9)           |                |
| Severe Diastolic Dysfunction                | 40 (25.8)           | 21 (41.2)           | 19 (18.3)           |                |
| <b>Left Ventricular Indices in Diastole</b> | <b>N (%)</b>        | <b>N (%)</b>        | <b>N (%)</b>        | <b>p-value</b> |
| Concentric Hypertrophy                      | 49 (31.6)           | 15 (29.4)           | 34 (32.7)           | 0.680          |
| Eccentric Hypertrophy                       | 23 (14.8)           | 7 (13.7)            | 16 (15.4)           | 0.785          |
| RWT, mean ( $\pm$ SD)                       | 0.49 ( $\pm$ 0.10)  | 0.47 ( $\pm$ 0.12)  | 0.49 ( $\pm$ 0.12)  | 0.247          |
| Normal RWT                                  | 55 (35.5)           | 20 (39.2)           | 35 (33.7)           | 0.497          |
| High RWT                                    | 100 (64.5)          | 31 (60.8)           | 69 (66.4)           |                |
| IVSd, mean in mm ( $\pm$ SD)                | 10.97 ( $\pm$ 2.2)  | 10.7 ( $\pm$ 2.3)   | 11.1 ( $\pm$ 2.1)   | 0.195          |
| Normal IVSd                                 | 49 (31.6)           | 17 (33.3)           | 32 (30.8)           | 0.747          |
| High IVSd                                   | 106 (68.4)          | 34 (66.7)           | 72 (69.2)           |                |
| PWd, mean in mm ( $\pm$ SD)                 | 10.4 ( $\pm$ 1.8)   | 10.1 ( $\pm$ 2.1)   | 10.5 ( $\pm$ 1.7)   | 0.202          |
| Normal PWd                                  | 63 (40.7)           | 26 (51.0)           | 37 (35.6)           | 0.067          |
| High PWd                                    | 92 (59.4)           | 25 (49.0)           | 67 (64.4)           |                |
| LVM, mean in g ( $\pm$ SD)                  | 163.9 ( $\pm$ 42.0) | 159.2 ( $\pm$ 45.3) | 166.1 ( $\pm$ 40.4) | 0.338          |
| Normal LVM                                  | 83 (53.6)           | 29 (56.9)           | 54 (51.9)           | 0.562          |
| High LVM                                    | 72 (46.5)           | 22 (43.1)           | 50 (48.1)           |                |
| LVMi, mean in g/m <sup>2</sup> ( $\pm$ SD)  | 90.9 ( $\pm$ 21.1)  | 88.2 ( $\pm$ 21.3)  | 92.2 ( $\pm$ 21.0)  | 0.272          |
| Normal LVMi                                 | 84 (54.2)           | 29 (56.9)           | 55 (52.9)           | 0.640          |
| High LVMi                                   | 71 (45.8)           | 22 (43.1)           | 49 (47.1)           |                |
| <b>Valvular Pathologies</b>                 | <b>N (%)</b>        | <b>N (%)</b>        | <b>N (%)</b>        | <b>p-value</b> |
| AR (moderate, severe)                       | 3 (1.9)             | 2 (3.9)             | 1 (1.0)             | 0.252          |
| No AR (including trace and mild)            | 152 (98.1)          | 49 (96.1)           | 103 (99.0)          |                |
| MR (moderate, severe)                       | 3 (1.9)             | 2 (3.9)             | 1 (1.0)             | 0.252          |
| No MR (including trace and mild)            | 152 (98.1)          | 49 (96.1)           | 103 (99.0)          |                |
| MS (trace, mild, moderate, severe)          | 10 (6.5)            | 2 (3.9)             | 8 (7.7)             | 0.499          |
| No MS                                       | 145 (93.6)          | 49 (96.1)           | 96 (92.3)           |                |
| TR (moderate, severe)                       | 5 (3.2)             | 2 (3.9)             | 3 (2.9)             | 0.664          |
| No TR (including trace and mild)            | 150 (96.8)          | 49 (96.1)           | 101 (97.1)          |                |
| PR (moderate, severe)                       | 1 (0.7)             | 0                   | 1 (1.0)             | 1.00           |
| No PR (including trace and mild)            | 154 (99.4)          | 51 (100.0)          | 103 (99.0)          |                |

**Table Legend.** EF, ejection fraction; TTE, transthoracic echocardiogram; RWT, relative wall thickness; IVSd, interventricular septum diameter; PWd, posterior wall diameter; LVM/LVMi, left

ventricular mass/index; PASP, pulmonary artery systolic pressure; RV, right ventricle; AR, aortic regurgitation; MR, mitral regurgitation; MS, mitral stenosis; TR, tricuspid regurgitation; PR, pulmonary regurgitation. \* This Chi-square test compared EF<40% and EF 41-49% (as a composite variable) versus EF  $\geq$ 50%. \*\* This Chi-square test compared normal diastolic function and mild diastolic dysfunction (as a composite variable) versus moderate and severe diastolic dysfunction (as a composite variable).

**Supplementary Table 6. Missing Data**

|                                            | Combined ECG and TTE Sub-Samples (n= 801) | Sub-Sample with ECG (n=729) | Sub-Sample with TTE (n=155) |
|--------------------------------------------|-------------------------------------------|-----------------------------|-----------------------------|
| <b>Demographic-Ethnic Characteristics</b>  | % missing data                            | % missing data              | % missing data              |
| Age, years (Mean, $\pm$ SD)                | 0.1%                                      | 0.0%                        | 0.6%                        |
| Female (N, %)                              | 0.1%                                      | 0.0%                        | 0.6%                        |
| <b>Vital Signs</b>                         |                                           |                             |                             |
| SBP, in mm Hg (Mean, $\pm$ SD)             | 0.7%                                      | 0.8%                        | 0.6%                        |
| DBP, in mm Hg (Mean, $\pm$ SD)             | 0.7%                                      | 0.8%                        | 0.6%                        |
| Heart Rate, in bpm (Mean, $\pm$ SD)        | 0.7%                                      | 0.8%                        | 0.6%                        |
| BMI, in kg/m <sup>2</sup> (Mean, $\pm$ SD) | 0.1%                                      | 0.1%                        | 0.6%                        |
| <b>Laboratory Measurements</b>             |                                           |                             |                             |
| Hs-CRP, in mg/dL (Mean, IQR)               | 9.4%                                      | 9.6%                        | 8.4%                        |
| Cholesterol, in mmol/L (Mean, $\pm$ SD)    | 11.9%                                     | 12.2%                       | 5.8%                        |
| HDL, in mmol/L (Mean, $\pm$ SD)            | 10.5%                                     | 10.8%                       | 5.2%                        |
| LDL, in mmol/L (Mean, $\pm$ SD)            | 20.7%                                     | 20.6%                       | 16.8%                       |
| Triglycerides, in mmol/L (Mean, $\pm$ SD)  | 10.9%                                     | 11.0%                       | 6.5%                        |
| Blood Glucose, in mmol/L (Mean, IQR)       | 3.5%                                      | 3.7%                        | 0.6%                        |
| <b>Risk Factors</b>                        | N (%)                                     | N (%)                       | N (%)                       |
| Current Tobacco Smoking                    | 0.0%                                      | 0.0%                        | 0.0%                        |
| <b>Alcohol Use</b>                         |                                           |                             |                             |
| Drank at least once in last 30 days        | 0.0%                                      | 0.0%                        | 0.0%                        |
| Consumed >6 drinks in a day                | 0.0%                                      | 0.0%                        | 0.0%                        |
